# Supplementary material for: Analysis of the platypus genome suggests a transposon origin for mammalian imprinting
Source: PubMed Central journal article supplement (PMC2687786; doi:10.1186/gb-2009-10-1-r1), 2009-01-02
Supplement: gb-2009-10-1-r1-S4.pdf [file gb-2009-10-1-r1-S4.pdf]

| Map page | Chrom. Band (human) | Genes/features                | Human                                  | Mouse                                                              | Dog                                                      | Opossum                                                                                                     | Platypus                                                                                                                          | Chicken                                                                |
|----------|---------------------|-------------------------------|----------------------------------------|--------------------------------------------------------------------|----------------------------------------------------------|-------------------------------------------------------------------------------------------------------------|-----------------------------------------------------------------------------------------------------------------------------------|------------------------------------------------------------------------|
| 1        | 1p36.32             | <b>TP73</b>                   | chr1:3,558,944-3,642,625 (I)           | chr4:152,902,082-152,984,008 (I)                                   | chr5:61,199,527-61,241,393                               | chr4:389,858,020-389,945,132                                                                                | Ultra178:1,123,945-1,143,179                                                                                                      | chr21:912,435-939,684                                                  |
| NA       | 1p31                | ARHI/DIRAS3                   | chr1:68,283,023-68,290,278 (I)         | NO                                                                 | NO                                                       | NO                                                                                                          | NO                                                                                                                                | NO                                                                     |
| 2        | 2p15                | COMMD1 (U2af1-rs1)            | chr2:61,986,292-62,216,698 (NI)<br>NO' | chr11:22,799,728-22,882,284 (I)<br>chr11:22,873,215-22,876,498 (I) | chr10:65,037,469-65,210,770<br>NO                        | chr1:630,290,345-630,540,770<br>NO                                                                          | Ultra56:4,473,791-4,620,115<br>NO                                                                                                 | chr3:8,903,451-8,969,942<br>NO                                         |
| NA       | 4q13                | (Mkrr1-ps1)                   | NO'                                    | In the interval<br>chr5:89,857,838-90,009,9311 (I)                 | NA                                                       | NA                                                                                                          | NA                                                                                                                                | NA                                                                     |
| 3        | 4q22                | NAP1L5                        | chr4:89,837,380-89,837,928 (NR)        | chr6:58,836,075-58,836,545 (I)                                     | chr32:14,918,042-14,918,578                              | NO                                                                                                          | NO                                                                                                                                | NO                                                                     |
| 4        | 6q24                | <b>PLAGL1</b><br><b>HYMAI</b> | chr6:144,303,130-144,371,246 (I)<br>I  | chr10:12,780,986-12,819,853 (I)                                    | chr1:38,462,172-38,467,955                               | chr2:422,110,909-422,129,064                                                                                | chr2:17,204,472-17,210,716                                                                                                        | chr3:54,201,457-54,202,728                                             |
| 5        | 6q25                | <b>IGF2R cluster</b>          | chr6:160,310,121-160,796,004           | chr17:12,263,330-12,613,022                                        | chr1:52,221,869-52,539,630                               | chr2:442,406,287-442,973,871                                                                                | Fragmented & most genes not in WGS assembly                                                                                       | chr3:47,288,282-47,411,223                                             |
|          |                     | IGF2R                         | NI                                     | I                                                                  | O                                                        | O                                                                                                           | Chr 2 - centric* Fragment on Ultra61                                                                                              | O                                                                      |
|          |                     | (Air)                         | NO'                                    | I                                                                  | NA                                                       | NA                                                                                                          | NA                                                                                                                                | NA                                                                     |
|          |                     | SLC22A2                       | NR                                     | I                                                                  | O                                                        | O                                                                                                           | Missing from WGS assembly                                                                                                         | O                                                                      |
|          |                     | SLC22A3                       | NR                                     | I                                                                  | O                                                        | O                                                                                                           | Contig2038                                                                                                                        | O                                                                      |
| 6        | 7p12                | <b>GRB10</b>                  | chr7:50,625,260-50,828,652 (I)         | chr11:11,830,511-11,937,390 (I)                                    | chr18:4,878,320-4,905,682                                | chr6:267,072,104-267,174,894                                                                                | chr4:9,189,613-9,284,939 (chr 4p*)                                                                                                | chr2:83,096,709-83,234,014                                             |
| 7        | 7q21                | <b>PEG10 cluster</b>          | chr7:92,891,735-96,492,079             | chr6:3,637,395-6,874,963                                           | chr14:21,872,312-25,033,706                              | chrUn:10,910,032-84,197,983<br>Some are clustered to contigs.                                               | The cluster is fragmented and most genes are not present in the WGS assembly.                                                     | chr2:22,860,906-24,415,562                                             |
|          |                     | CALCR                         | PD                                     | I                                                                  | O                                                        | NO                                                                                                          | NO                                                                                                                                | NO                                                                     |
|          |                     | SGCE                          | I                                      | I                                                                  | O                                                        | O                                                                                                           | O (Contig1947)                                                                                                                    | O                                                                      |
|          |                     | PEG10                         | I                                      | I                                                                  | NO                                                       | NO                                                                                                          | NO                                                                                                                                | NO                                                                     |
|          |                     | PPP1R9A                       | I                                      | I                                                                  | O                                                        | NO                                                                                                          | NO                                                                                                                                | NO                                                                     |
|          |                     | PON1                          | PD                                     | NI                                                                 | O                                                        | O                                                                                                           | Not present                                                                                                                       |                                                                        |
|          |                     | PON3                          | NR                                     | PD                                                                 | O                                                        | O                                                                                                           | Not present                                                                                                                       | A single PON family member is present                                  |
|          |                     | PON2                          | NR                                     | PD                                                                 | O                                                        | O                                                                                                           | Not present                                                                                                                       |                                                                        |
|          |                     | ASB4                          | NR                                     | I                                                                  | O                                                        | O                                                                                                           | Not present                                                                                                                       | O                                                                      |
|          |                     | DLX5                          | I                                      | NI                                                                 | O                                                        | O                                                                                                           | Not present                                                                                                                       | O                                                                      |
| 8        | 7q32                | <b>MEST cluster</b>           | chr7:129,720,229-130,004,138           | chr6:30,518,386-30,827,142                                         | chr14:9,304,266-9,594,583                                | chr8:190,305,230-190,512,697                                                                                | chr10:4,897,302-5,045,606                                                                                                         | chr1:818,869-873,265                                                   |
|          |                     | CPA4                          | I                                      | NR                                                                 | O                                                        | O                                                                                                           | O                                                                                                                                 | P                                                                      |
|          |                     | MEST                          | I                                      | I                                                                  | O                                                        | O                                                                                                           | O                                                                                                                                 | O                                                                      |
|          |                     | MESTIT1                       | I                                      | NO'                                                                | NA                                                       | NA                                                                                                          | NA                                                                                                                                | NA                                                                     |
|          |                     | COPG2IT1                      | I                                      | I                                                                  | NA                                                       | NA                                                                                                          | NA                                                                                                                                | NA                                                                     |
|          |                     | COPG2                         | CD                                     | I                                                                  | O                                                        | O                                                                                                           | O                                                                                                                                 | NO                                                                     |
| NA       | mouse 15qD3         | (Peg13)                       | NO'                                    | chr15:72,632,860-72,637,580 (I)                                    | NA                                                       | NA                                                                                                          | NA                                                                                                                                | NA                                                                     |
| 9        | 10q22               | <b>CTNNA3</b>                 | chr10:67,349,725-69,125,933 (PD)       | chr10:62,899,394-64,398,190 (NR)                                   | chr4:20,577,292-20,755,158<br>chr4:22,057,498-22,195,110 | chr1:29,149,665-29,267,868                                                                                  | chr3:54,029,573-54,043,119                                                                                                        | chr6:7,775,606-8,203,040                                               |
| NA       | 10q25               | Ins1                          | NO'                                    | chr19:52,317,765-52,318,343 (CD)                                   | NO                                                       | NO                                                                                                          | NO                                                                                                                                | NO                                                                     |
| 10       | 11p15               | <b>IGF2 cluster</b>           | chr11:1,972,984-3,143,116              | chr7:142,244,367-143,587,755                                       | chr18:49,099,550-50,068,310                              | The cluster is fragmented and several genes are not present in the WGS. TH is on chr8:82,441,041-82,502,283 | None of the eutherian-imprinted genes are present in the annotation. Cluster is split across multiple contigs. TH is on Ultra443. | chr5:14,090,506-14,883,396<br>Key orthologues are present & clustered. |
|          |                     | H19                           | I                                      | I                                                                  | NA                                                       | NA                                                                                                          | NA                                                                                                                                | NA                                                                     |
|          |                     | IGF2                          | I                                      | I                                                                  | O                                                        | NA                                                                                                          | NA (Chr 2 centric*)                                                                                                               | O                                                                      |
|          |                     | IGF2AS                        | I                                      | I                                                                  | NA                                                       | NA                                                                                                          | NA                                                                                                                                | NA                                                                     |
|          |                     | INS                           | I                                      | I                                                                  | O                                                        | NA                                                                                                          | NA                                                                                                                                | O                                                                      |
|          |                     | ASCL2                         | CD                                     | I                                                                  | NO                                                       | NO                                                                                                          | NO                                                                                                                                | NO                                                                     |
|          |                     | PHEMX                         | NI                                     | I                                                                  | O                                                        | NO                                                                                                          | NO                                                                                                                                | NO                                                                     |
|          |                     | CD81                          | NI                                     | I                                                                  | O                                                        | NO                                                                                                          | NO                                                                                                                                | NO                                                                     |
|          |                     | TSSC4                         | NI                                     | I                                                                  | O                                                        | O (chrUn:76,673,683-76,674,915)                                                                             | NO                                                                                                                                | O                                                                      |
|          |                     | TRPM5                         | PD                                     | NI                                                                 | I                                                        | NO                                                                                                          | NO                                                                                                                                | O                                                                      |
|          |                     | KCNQ1                         | I                                      | I                                                                  | O                                                        | O (chrUn:76,673,683-76,674,915)                                                                             | NO                                                                                                                                | O                                                                      |
|          |                     | KCNQ1OT1                      | I                                      | I                                                                  | NA                                                       | NA                                                                                                          | NA                                                                                                                                | NA                                                                     |
|          |                     | KCNQ1DN                       | I                                      | NO                                                                 | NO                                                       | NO                                                                                                          | NO                                                                                                                                | NO                                                                     |
|          |                     | CDKN1C                        | I                                      | I                                                                  | NO                                                       | NO                                                                                                          | NO                                                                                                                                | NO                                                                     |
|          |                     | SLC22A1L5                     | PD                                     | NO                                                                 | NO                                                       | NO                                                                                                          | NO                                                                                                                                | NO                                                                     |
|          |                     | (Msuit1)                      | NO                                     | I                                                                  | NA                                                       | NA                                                                                                          | NA                                                                                                                                | NA                                                                     |
|          |                     | SLC22A18                      | I                                      | I                                                                  | O                                                        | NO                                                                                                          | NO                                                                                                                                | O                                                                      |
|          |                     | PHLDA2                        | I                                      | I                                                                  | NO                                                       | NO                                                                                                          | O (Contig17670)                                                                                                                   | NO                                                                     |
|          |                     | NAP1L4                        | NR                                     | I                                                                  | O                                                        | O (chr5:301647943-301923441)                                                                                | NO                                                                                                                                | O                                                                      |



| Map page | Chrom. Band (human) | Genes/features   | Human                            | Mouse                             | Dog                          | Opossum                      | Platypus                     | Chicken                      |
|----------|---------------------|------------------|----------------------------------|-----------------------------------|------------------------------|------------------------------|------------------------------|------------------------------|
|          |                     | RASGRF1          | NR                               | I                                 | O                            | O                            | O                            | O                            |
| 20       | 18q11               | IMPACT           | chr18:20,260,680-20,287,490 (NI) | chr18:13,115,421-13,136,117 (I)   | chr7:66,986,620-66,996,951   | chr3:259,995,454-260,031,256 | Contig20839                  | chr2:106,529,413-106,547,483 |
| 21       | 18q21               | TCEB3C           | chr18:42,808,571-42,810,211 (I)  | NO                                | NO                           | NO                           | NO                           | NO                           |
| 22       | 19q13               |                  | chr19:61,977,742-62,422,337      | chr7:6281009-6600000              | chr1:104,184,489-104,196,263 | No conserved synteny         | No conserved synteny         | No conserved synteny         |
|          |                     | PEG3/ZIM2 (Zim1) | I                                | I                                 | O                            | NO                           | NO                           | NO                           |
|          |                     | ZIM2             | NO                               | I                                 | NO                           | NO                           | NO                           | NO                           |
|          |                     | USP29            | I                                | I                                 | NO                           | NO                           | NO                           | NO                           |
|          |                     | ZIM3             | NR                               | I                                 | NO                           | NO                           | NO                           | NO                           |
|          |                     | ZNF264           | NR                               | I                                 | NO                           | NO                           | NO                           | NO                           |
| 23       | 20q11               | NNAT             | chr20:35,583,021-35,585,502 (I)  | chr2:157,251,551-157,253,958 (I)  | chr24:29,090,140-29,091,946  | NO                           | NO                           | NO                           |
| 24       | 20q13               | L3MBTL           | chr20:41,575,558-41,603,949 (I)  | chr2:162,638,630-162,665,966 (NR) | chr24:34,211,452-34,235,635  | chr1:385,894,559-385,957,809 | Ultra337:4,152,550-4,172,414 | chr20:29,872-47,955          |
| 25       | 20q13               | GNAS locus       | chr20:56,848,168-56,919,642      | chr2:173,927,270-173,989,683      | chr24:46,583,771-46,639,038  | chr1:483,863,859-484,051,250 | Ultra516:8,105,240-8,223,121 | chr20:10,870,284-10,950,671  |
|          |                     | GNAS             | I                                | I                                 | O                            | O                            | O (Chr 8p*)                  | O                            |
|          |                     | SANG (Nespas)    | I                                | I                                 | NA                           | NA                           | NA                           | NA                           |
| NA       | Xq13                | XIST locus       | chrX:72,957,211-72,989,313       | chrX:99,663,092-99,670,276        |                              |                              |                              |                              |
|          |                     | XIST             | NI                               | I                                 | NA                           | NA                           | NA                           | NA                           |
|          |                     | TSIX             | NI                               | I                                 | NA                           | NA                           | NA                           | NA                           |

Additional Data file 4: Conservation of imprinted gene orthologues and regions within the human, mouse, dog, opossum, platypus and chicken genomes. The location of orthologous sequences is listed for each species. Localisations denoted with \* are derived from reference Edwards et al. 2007. O indicates the presence of a gene orthologue, NO indicates no orthologue found, NO' indicates no orthologue found, based on previous analyses (Morison et al. 2005), NA indicates orthologues were not in the assembly/annotation, I indicates imprinted genes, NI indicated non-imprinted genes, NR indicated no reports of imprinting status, CD indicated conflicting data with respect to imprint status and PD indicated provisional data based on previous analyses (Morison et al. 2005). With the exception of the SNRPN locus, the genes that are conserved across all species, form ancient syntenic clusters. Some clusters have arisen recently and appear to be specific to the eutherians. Further detailed analyses of repeat distribution were performed on nineteen genes or regions shown from this analysis (highlighted in yellow) to be conserved across all genomes examined.
