# Supplementary material for: Analysis of the platypus genome suggests a transposon origin for mammalian imprinting
Source: PubMed Central journal article supplement (PMC2687786; doi:10.1186/gb-2009-10-1-r1), 2009-01-02
Supplement: gb-2009-10-1-r1-S5.pdf [file gb-2009-10-1-r1-S5.pdf]

p-values from pairwise t-tests comparing proportion of sequence in each repeat class  
between each species in orthologous imprinted regions

**Additional data file 5**

| Repeat family  |          | Human                                 | Mouse                                 | Dog                                   | Opossum                              | Platypus                              |
|----------------|----------|---------------------------------------|---------------------------------------|---------------------------------------|--------------------------------------|---------------------------------------|
| LTRs           | Mouse    | 0.7                                   | -                                     | -                                     | -                                    | -                                     |
|                | Dog      | <u>0.01</u>                           | <u>0.001</u>                          | -                                     | -                                    | -                                     |
|                | Opossum  | 0.4                                   | 0.2                                   | 0.4                                   | -                                    | -                                     |
|                | Platypus | <u><math>6 \times 10^{-9}</math></u>  | <u><math>4 \times 10^{-10}</math></u> | <u>0.002</u>                          | <u><math>6 \times 10^{-6}</math></u> | -                                     |
|                | Chicken  | <u><math>2 \times 10^{-7}</math></u>  | <u><math>2 \times 10^{-8}</math></u>  | <u>0.03</u>                           | <u>0.0002</u>                        | 0.7                                   |
| DNA elements   | Mouse    | <u>0.02</u>                           | -                                     | -                                     | -                                    | -                                     |
|                | Dog      | 0.08                                  | 0.97                                  | -                                     | -                                    | -                                     |
|                | Opossum  | 0.2                                   | 0.97                                  | 1                                     | -                                    | -                                     |
|                | Platypus | <u><math>7 \times 10^{-5}</math></u>  | <u>0.02</u>                           | <u>0.002</u>                          | <u>0.006</u>                         | -                                     |
|                | Chicken  | <u><math>3 \times 10^{-5}</math></u>  | <u>0.006</u>                          | <u>0.001</u>                          | <u>0.002</u>                         | 1                                     |
| Simple repeats | Mouse    | <u><math>7 \times 10^{-7}</math></u>  | -                                     | -                                     | -                                    | -                                     |
|                | Dog      | 0.4                                   | <u><math>2 \times 10^{-5}</math></u>  | -                                     | -                                    | -                                     |
|                | Opossum  | 1                                     | <u>0.0004</u>                         | 1                                     | -                                    | -                                     |
|                | Platypus | 0.4                                   | <u><math>1 \times 10^{-7}</math></u>  | <u>0.01</u>                           | 0.4                                  | -                                     |
|                | Chicken  | 0.4                                   | <u><math>5 \times 10^{-10}</math></u> | <u>0.0007</u>                         | 0.3                                  | 1                                     |
| Low complexity | Mouse    | 0.08                                  | -                                     | -                                     | -                                    | -                                     |
|                | Dog      | 0.2                                   | 1                                     | -                                     | -                                    | -                                     |
|                | Opossum  | 1                                     | 1                                     | 1                                     | -                                    | -                                     |
|                | Platypus | 1                                     | <u>0.05</u>                           | <u>0.07</u>                           | 1                                    | -                                     |
|                | Chicken  | 1                                     | 0.5                                   | 0.6                                   | 1                                    | 1                                     |
| SINEs          | Mouse    | 0.1                                   | -                                     | -                                     | -                                    | -                                     |
|                | Dog      | 0.2                                   | 1                                     | -                                     | -                                    | -                                     |
|                | Opossum  | 1                                     | 0.1                                   | 0.2                                   | -                                    | -                                     |
|                | Platypus | <u>0.02</u>                           | <u><math>3 \times 10^{-5}</math></u>  | <u><math>8 \times 10^{-5}</math></u>  | 0.06                                 | -                                     |
|                | Chicken  | <u><math>2 \times 10^{-11}</math></u> | <u><math>4 \times 10^{-10}</math></u> | <u><math>2 \times 10^{-11}</math></u> | <u><math>3 \times 10^{-9}</math></u> | <u><math>5 \times 10^{-11}</math></u> |
| LINEs          | Mouse    | 0.2                                   | -                                     | -                                     | -                                    | -                                     |
|                | Dog      | 1                                     | 0.5                                   | -                                     | -                                    | -                                     |
|                | Opossum  | 0.9                                   | <u>0.02</u>                           | 0.8                                   | -                                    | -                                     |
|                | Platypus | 1                                     | <u>0.01</u>                           | 1                                     | 1                                    | -                                     |
|                | Chicken  | <u><math>6 \times 10^{-5}</math></u>  | 0.08                                  | <u>0.001</u>                          | <u><math>4 \times 10^{-5}</math></u> | <u><math>3 \times 10^{-8}</math></u>  |
| RNAs           | Mouse    | 1                                     | -                                     | -                                     | -                                    | -                                     |
|                | Dog      | 1                                     | 0.2                                   | -                                     | -                                    | -                                     |
|                | Opossum  | 0.6                                   | <u>0.04</u>                           | 1                                     | -                                    | -                                     |
|                | Platypus | 0.8                                   | 0.09                                  | 1                                     | 1                                    | -                                     |
|                | Chicken  | 0.08                                  | <u>0.005</u>                          | 0.2                                   | 0.8                                  | 1                                     |
| Total repeats  | Mouse    | 0.06                                  | -                                     | -                                     | -                                    | -                                     |
|                | Dog      | 0.3                                   | 1                                     | -                                     | -                                    | -                                     |
|                | Opossum  | 1                                     | 0.1                                   | 0.3                                   | -                                    | -                                     |
|                | Platypus | 1                                     | 0.06                                  | 0.3                                   | 1                                    | -                                     |
|                | Chicken  | <u><math>4 \times 10^{-13}</math></u> | <u><math>4 \times 10^{-10}</math></u> | <u><math>3 \times 10^{-7}</math></u>  | <u><math>8 \times 10^{-8}</math></u> | <u><math>9 \times 10^{-12}</math></u> |

p-values from pairwise t-tests comparing proportion of sequence in each repeat class  
between each species in the whole genome

**Table S2B**

| Repeat family           |          | Human               | Mouse               | Dog                 | Opossum             | Platypus            |
|-------------------------|----------|---------------------|---------------------|---------------------|---------------------|---------------------|
| LTRs                    | Mouse    | $2 \times 10^{-16}$ | -                   | -                   | -                   | -                   |
|                         | Dog      | $2 \times 10^{-16}$ | $2 \times 10^{-16}$ | -                   | -                   | -                   |
|                         | Opossum  | $2 \times 10^{-16}$ | $2 \times 10^{-16}$ | $2 \times 10^{-16}$ | -                   | -                   |
|                         | Platypus | $2 \times 10^{-16}$ | $2 \times 10^{-16}$ | $2 \times 10^{-16}$ | $2 \times 10^{-16}$ | -                   |
|                         | Chicken  | $2 \times 10^{-16}$ | $2 \times 10^{-16}$ | $2 \times 10^{-16}$ | $2 \times 10^{-16}$ | $2 \times 10^{-16}$ |
| DNA elements            | Mouse    | $2 \times 10^{-16}$ | -                   | -                   | -                   | -                   |
|                         | Dog      | $2 \times 10^{-16}$ | $2 \times 10^{-16}$ | -                   | -                   | -                   |
|                         | Opossum  | $2 \times 10^{-16}$ | $2 \times 10^{-16}$ | $2 \times 10^{-16}$ | -                   | -                   |
|                         | Platypus | $2 \times 10^{-16}$ | 0.005               | $2 \times 10^{-16}$ | $2 \times 10^{-16}$ | -                   |
|                         | Chicken  | $2 \times 10^{-16}$ | $5 \times 10^{-13}$ | $2 \times 10^{-16}$ | $2 \times 10^{-16}$ | $2 \times 10^{-16}$ |
| Simple repeats          | Mouse    | $2 \times 10^{-16}$ | -                   | -                   | -                   | -                   |
|                         | Dog      | $2 \times 10^{-16}$ | $2 \times 10^{-16}$ | -                   | -                   | -                   |
|                         | Opossum  | $2 \times 10^{-16}$ | $2 \times 10^{-16}$ | $2 \times 10^{-16}$ | -                   | -                   |
|                         | Platypus | $2 \times 10^{-16}$ | $2 \times 10^{-16}$ | $2 \times 10^{-16}$ | $2 \times 10^{-16}$ | -                   |
|                         | Chicken  | $2 \times 10^{-16}$ | $2 \times 10^{-16}$ | $2 \times 10^{-16}$ | $2 \times 10^{-16}$ | 0.2                 |
| Low complexity sequence | Mouse    | $2 \times 10^{-16}$ | -                   | -                   | -                   | -                   |
|                         | Dog      | $2 \times 10^{-16}$ | $2 \times 10^{-16}$ | -                   | -                   | -                   |
|                         | Opossum  | $2 \times 10^{-16}$ | 0.002               | $2 \times 10^{-16}$ | -                   | -                   |
|                         | Platypus | $2 \times 10^{-16}$ | $2 \times 10^{-16}$ | $2 \times 10^{-16}$ | $2 \times 10^{-16}$ | -                   |
|                         | Chicken  | 0.1                 | $2 \times 10^{-16}$ | $2 \times 10^{-16}$ | $2 \times 10^{-16}$ | $2 \times 10^{-16}$ |
| SINEs                   | Mouse    | $2 \times 10^{-16}$ | -                   | -                   | -                   | -                   |
|                         | Dog      | $2 \times 10^{-16}$ | $2 \times 10^{-16}$ | -                   | -                   | -                   |
|                         | Opossum  | 0.01                | $2 \times 10^{-16}$ | $2 \times 10^{-16}$ | -                   | -                   |
|                         | Platypus | $2 \times 10^{-16}$ | $2 \times 10^{-16}$ | $2 \times 10^{-16}$ | $2 \times 10^{-16}$ | -                   |
|                         | Chicken  | $2 \times 10^{-16}$ | $2 \times 10^{-16}$ | $2 \times 10^{-16}$ | $2 \times 10^{-16}$ | $2 \times 10^{-16}$ |
| LINEs                   | Mouse    | 0.01                | -                   | -                   | -                   | -                   |
|                         | Dog      | 0.1                 | 0.2                 | -                   | -                   | -                   |
|                         | Opossum  | $2 \times 10^{-16}$ | $2 \times 10^{-16}$ | $2 \times 10^{-16}$ | -                   | -                   |
|                         | Platypus | 0.0003              | $4 \times 10^{-10}$ | $7 \times 10^{-10}$ | $2 \times 10^{-16}$ | -                   |
|                         | Chicken  | $2 \times 10^{-16}$ | $2 \times 10^{-16}$ | $2 \times 10^{-16}$ | $2 \times 10^{-16}$ | $2 \times 10^{-16}$ |
| RNA                     | Mouse    | $2 \times 10^{-16}$ | -                   | -                   | -                   | -                   |
|                         | Dog      | $2 \times 10^{-16}$ | $2 \times 10^{-16}$ | -                   | -                   | -                   |
|                         | Opossum  | $2 \times 10^{-16}$ | $2 \times 10^{-16}$ | $2 \times 10^{-16}$ | -                   | -                   |
|                         | Platypus | $2 \times 10^{-16}$ | $2 \times 10^{-16}$ | $2 \times 10^{-16}$ | 0.05                | -                   |
|                         | Chicken  | $2 \times 10^{-16}$ | $2 \times 10^{-16}$ | $2 \times 10^{-16}$ | $2 \times 10^{-16}$ | $2 \times 10^{-16}$ |
| Total repeats           | Mouse    | $2 \times 10^{-16}$ | -                   | -                   | -                   | -                   |
|                         | Dog      | $2 \times 10^{-16}$ | $2 \times 10^{-16}$ | -                   | -                   | -                   |
|                         | Opossum  | $2 \times 10^{-16}$ | $2 \times 10^{-16}$ | $2 \times 10^{-16}$ | -                   | -                   |
|                         | Platypus | $2 \times 10^{-6}$  | $4 \times 10^{-8}$  | $2 \times 10^{-16}$ | $2 \times 10^{-16}$ | -                   |
|                         | Chicken  | $2 \times 10^{-16}$ | $2 \times 10^{-16}$ | $2 \times 10^{-16}$ | $2 \times 10^{-16}$ | $2 \times 10^{-16}$ |
